# Supplementary material
Source: HighWire-hosted journal article supplement (https://erj.ersjournals.com/content/59/3/2101269)

**Figure E1: Effect of helmet NIV compared to facemask NIV on mortality. Observational data only. Df = degrees of freedom**

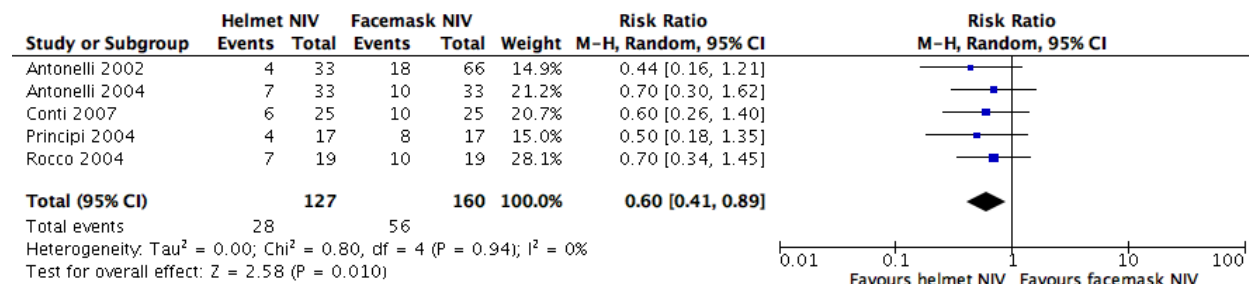

**Figure E2: Effect of helmet NIV compared to facemask NIV on intubation. Observational data only. Studies are grouped by type of respiratory failure. Df = degrees of freedom**

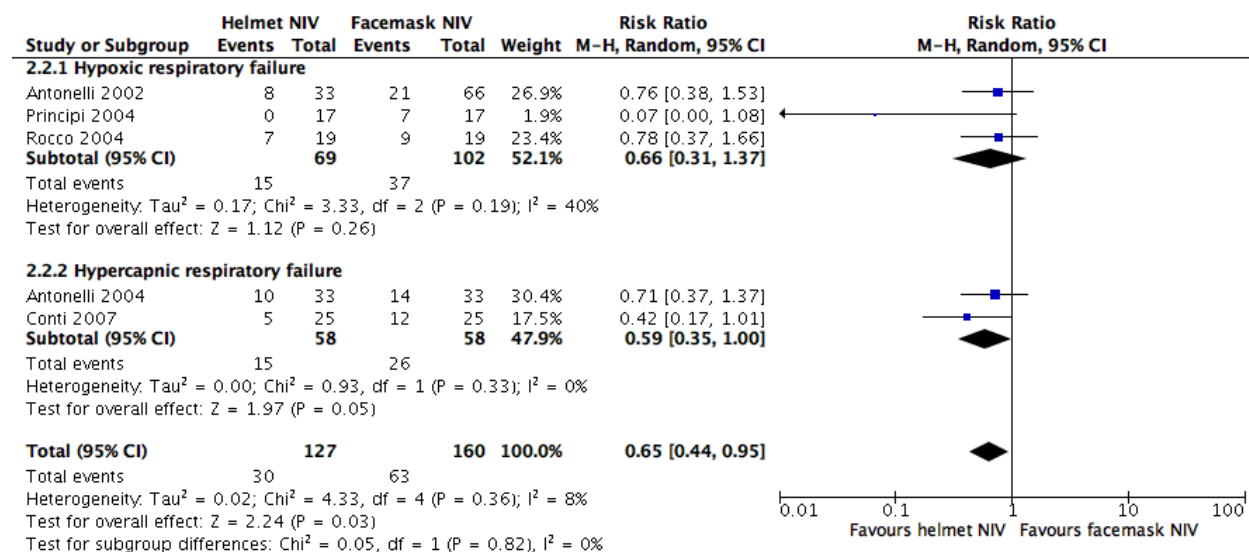

**Figure E3: Effect of helmet NIV compared to facemask NIV on ICU length of stay. Observational data only. Df = degrees of freedom**

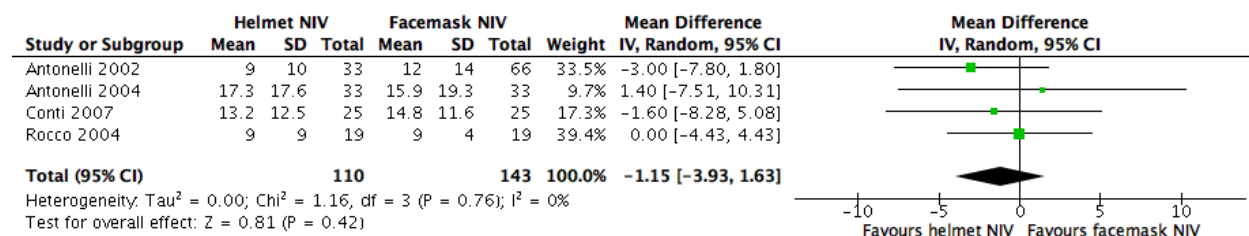

**Figure E4: Effect of helmet NIV compared to facemask NIV on duration of NIV. Observational data only. Df = degrees of freedom**

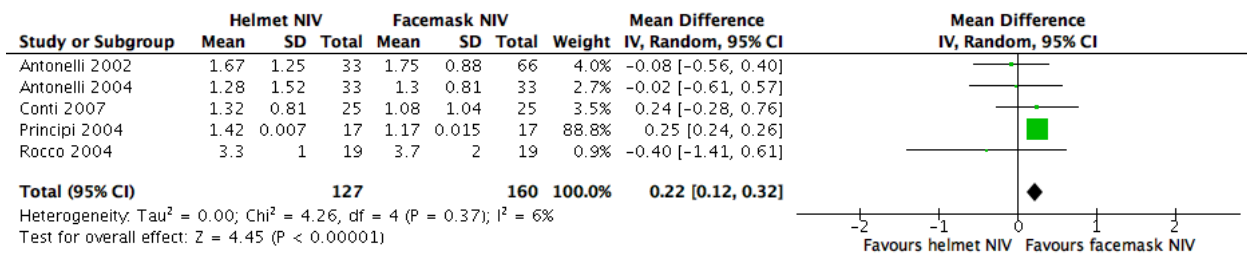

**Figure E5: Effect of helmet NIV compared to high flow nasal cannula on intubation. Observational data only. Df = degrees of freedom**

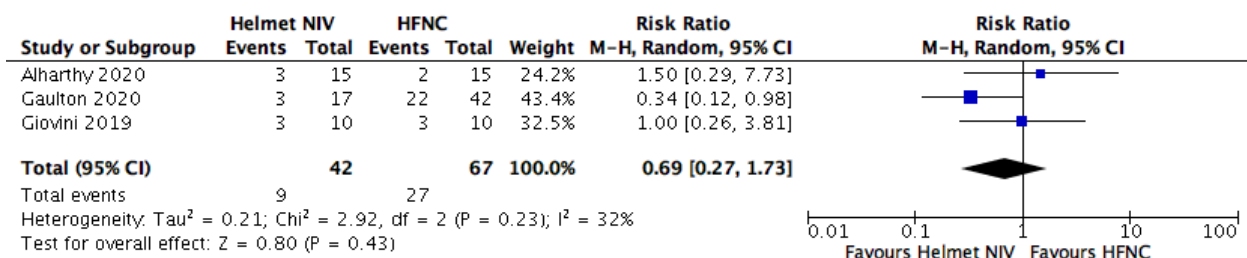

**Figure E6: Effect of helmet NIV compared to high flow nasal cannula on mortality. Observational data only. Df = degrees of freedom**

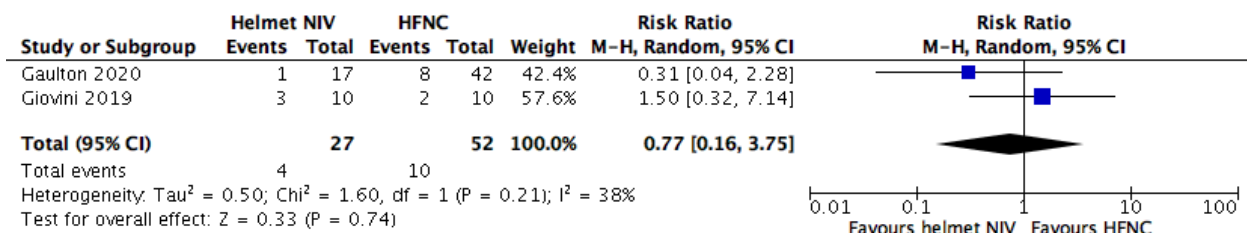

**Figure E7: Effect of helmet NIV compared to facemask NIV on facial pressure sores. RCT data only. Df = degrees of freedom**

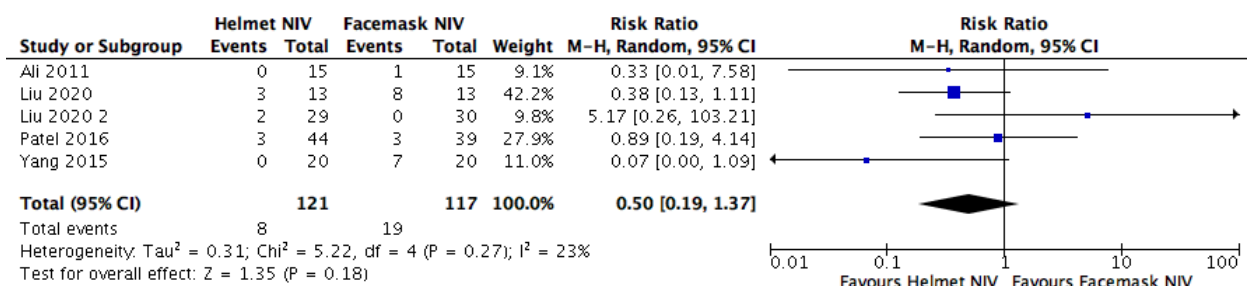

**Figure E8: Effect of helmet NIV compared to facemask NIV on intubation. Studies are group by risk of bias. RCT data only. Df = degrees of freedom**

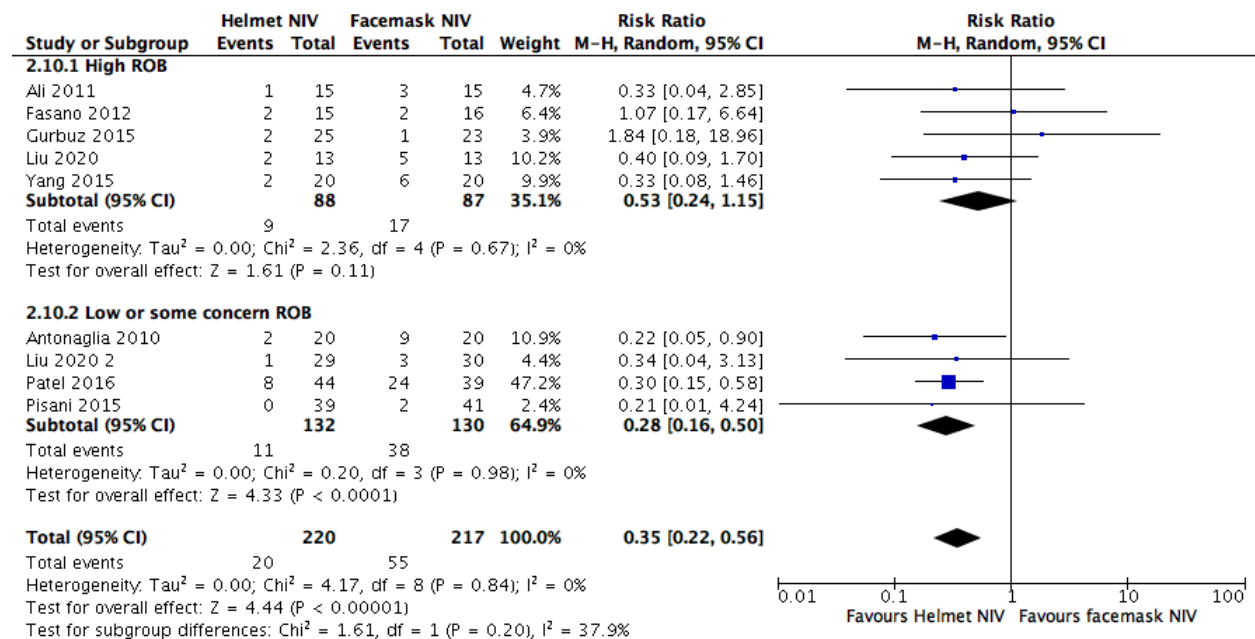

**Figure E9: Funnel plot of helmet NIV compared to facemask NIV for the outcome of mortality**

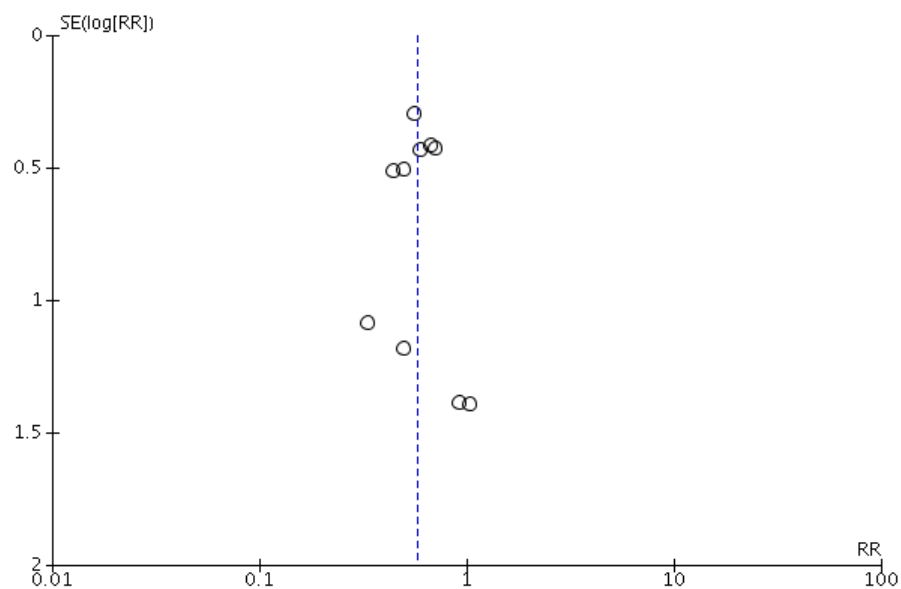

**Figure E10: Funnel plot of helmet NIV compared to facemask NIV for the outcome of intubation**

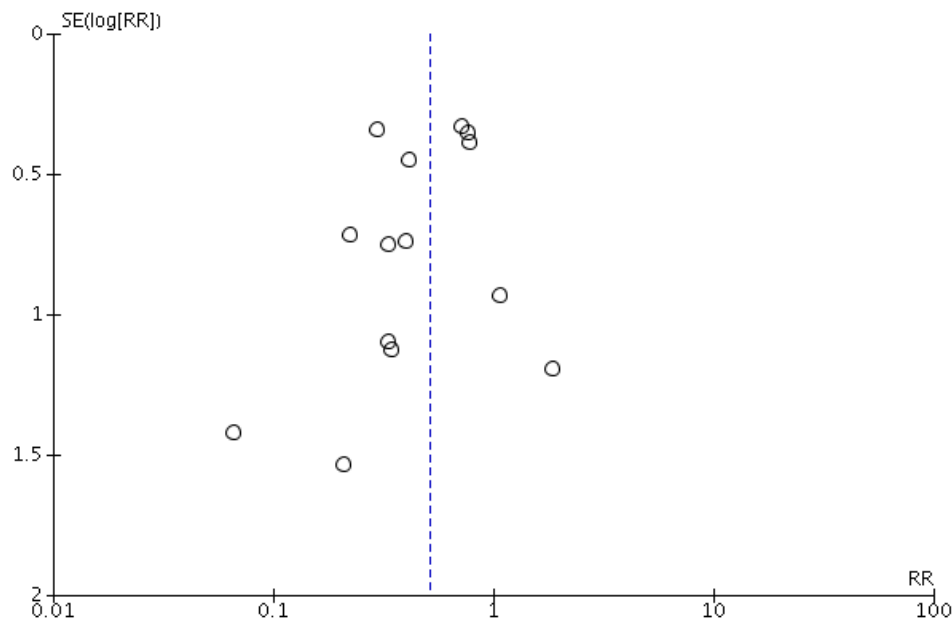

**Figure E11: Effect of helmet NIV compared to facemask NIV on mortality. Studies are group by risk of bias. RCT data only. Df = degrees of freedom**

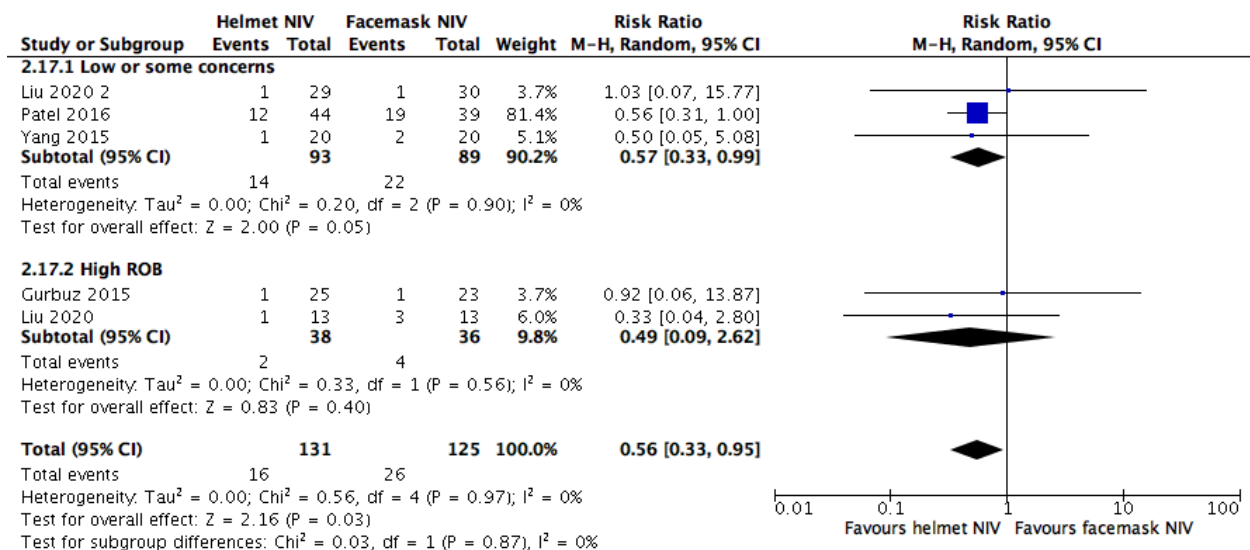

Supplement: inline-supplementary-material-2 [file inline-supplementary-material-2.pdf]
