# Supplementary material
Source: HighWire-hosted journal article supplement (https://erj.ersjournals.com/content/59/3/2101269)
Supplement: inline-supplementary-material-1 [file inline-supplementary-material-1.pdf]

**Supplementary Table E1: PRISMA checklist**

|                                    | #  | Checklist item                                                                                                                                                                                                                                                                                              | Reported on page #         |
|------------------------------------|----|-------------------------------------------------------------------------------------------------------------------------------------------------------------------------------------------------------------------------------------------------------------------------------------------------------------|----------------------------|
| <b>TITLE</b>                       |    |                                                                                                                                                                                                                                                                                                             |                            |
| Title                              | 1  | Identify the report as a systematic review, meta-analysis, or both.                                                                                                                                                                                                                                         | 1                          |
| <b>ABSTRACT</b>                    |    |                                                                                                                                                                                                                                                                                                             |                            |
| Structured summary                 | 2  | Provide a structured summary including, as applicable: background; objectives; data sources; study eligibility criteria, participants, and interventions; study appraisal and synthesis methods; results; limitations; conclusions and implications of key findings; systematic review registration number. | 4                          |
| <b>INTRODUCTION</b>                |    |                                                                                                                                                                                                                                                                                                             |                            |
| Rationale                          | 3  | Describe the rationale for the review in the context of what is already known.                                                                                                                                                                                                                              | 6                          |
| Objectives                         | 4  | Provide an explicit statement of questions being addressed with reference to participants, interventions, comparisons, outcomes, and study design (PICOS).                                                                                                                                                  | 7                          |
| <b>METHODS</b>                     |    |                                                                                                                                                                                                                                                                                                             |                            |
| Protocol and registration          | 5  | Indicate if a review protocol exists, if and where it can be accessed (e.g., Web address), and, if available, provide registration information including registration number.                                                                                                                               | 7                          |
| Eligibility criteria               | 6  | Specify study characteristics (e.g., PICOS, length of follow-up) and report characteristics (e.g., years considered, language, publication status) used as criteria for eligibility, giving rationale.                                                                                                      | 8                          |
| Information sources                | 7  | Describe all information sources (e.g., databases with dates of coverage, contact with study authors to identify additional studies) in the search and date last searched.                                                                                                                                  | 7                          |
| Search                             | 8  | Present full electronic search strategy for at least one database, including any limits used, such that it could be repeated.                                                                                                                                                                               | 7, Supplementary materials |
| Study selection                    | 9  | State the process for selecting studies (i.e., screening, eligibility, included in systematic review, and, if applicable, included in the meta-analysis).                                                                                                                                                   | 8                          |
| Data collection process            | 10 | Describe method of data extraction from reports (e.g., piloted forms, independently, in duplicate) and any processes for obtaining and confirming data from investigators.                                                                                                                                  | 9                          |
| Data items                         | 11 | List and define all variables for which data were sought (e.g., PICOS, funding sources) and any assumptions and simplifications made.                                                                                                                                                                       | 8                          |
| Risk of bias in individual studies | 12 | Describe methods used for assessing risk of bias of individual studies (including specification of whether this was done at the study or outcome level), and how this information is to be used in any data synthesis.                                                                                      | 9                          |

**Supplementary Table E1: PRISMA checklist**

|                      |    |                                                                                                                                                           |   |
|----------------------|----|-----------------------------------------------------------------------------------------------------------------------------------------------------------|---|
| Summary measures     | 13 | State the principal summary measures (e.g., risk ratio, difference in means).                                                                             | 9 |
| Synthesis of results | 14 | Describe the methods of handling data and combining results of studies, if done, including measures of consistency (e.g., $I^2$ ) for each meta-analysis. | 9 |

**Supplementary Table E2a: Risk of bias for RCTs for outcome of mortality**

| <b>Study</b> | <b>Randomization process</b> | <b>Deviations from intended interventions</b> | <b>Missing outcome data</b> | <b>Measurement of the outcome</b> | <b>Selection of the reported result</b> | <b>Overall Bias for the outcome of Mortality</b> |
|--------------|------------------------------|-----------------------------------------------|-----------------------------|-----------------------------------|-----------------------------------------|--------------------------------------------------|
| Adi, 2019    | Some concerns                | High                                          | Low                         | Low                               | Some concerns                           | High                                             |
| Gurbuz, 2015 | Some concerns                | High                                          | Low                         | Low                               | Some concerns                           | High                                             |
| Grieco, 2021 | Low                          | Low                                           | Low                         | Low                               | Low                                     | Low                                              |
| Liu 2020     | Some concerns                | Low                                           | Low                         | Low                               | Some concerns                           | High                                             |
| Patel 2016   | Low                          | Low                                           | Low                         | Low                               | Low                                     | Low                                              |
| Liu 2020 (2) | Low                          | Low                                           | Low                         | Low                               | Low                                     | Low                                              |
| Yang 2015    | Low                          | Low                                           | Low                         | Low                               | Some concerns                           | Some concerns                                    |

**Supplementary Table E2b: Risk of bias for observational studies**

| <b>Study</b>    | <b>Selection</b> | <b>Comparability</b> | <b>Outcome/Exposure</b> |
|-----------------|------------------|----------------------|-------------------------|
| Alharthy, 2020  | ****             | -                    | ***                     |
| Antonelli, 2002 | ****             | **                   | ***                     |
| Antonelli, 2004 | ****             | **                   | ***                     |
| Conti, 2007     | ****             | **                   | ***                     |
| Gaulton, 2020   | ***              | -                    | ***                     |
| Giovini, 2019   | ****             | **                   | ***                     |
| Principi, 2004  | ****             | **                   | ***                     |
| Rocco, 2004     | ****             | **                   | ***                     |

**Supplementary Table E2c: Risk of bias for RCTs for outcome of intubation**

| <b>Study</b>    | <b>Randomization process</b> | <b>Deviations from intended interventions</b> | <b>Missing outcome data</b> | <b>Measurement of the outcome</b> | <b>Selection of the reported result</b> | <b>Overall Bias for the outcome of Intubation</b> |
|-----------------|------------------------------|-----------------------------------------------|-----------------------------|-----------------------------------|-----------------------------------------|---------------------------------------------------|
| Adi, 2019       | Some concerns                | High                                          | Low                         | Low                               | Some concerns                           | High                                              |
| Ali, 2011       | Some concerns                | High                                          | Low                         | Low                               | Some concerns                           | High                                              |
| Antogalia, 2010 | Low                          | Low                                           | Low                         | Low                               | Some concerns                           | Some concerns                                     |
| Gurbuz, 2015    | Some concerns                | High                                          | Low                         | Low                               | Some concerns                           | High                                              |
| Fasano, 2012    | Some concerns                | High                                          | Low                         | Low                               | Some concerns                           | High                                              |

|                 |               |     |     |     |                  |      |
|-----------------|---------------|-----|-----|-----|------------------|------|
| Grieco,<br>2021 | Low           | Low | Low | Low | Low              | Low  |
| Liu 2020        | Some concerns | Low | Low | Low | Some<br>concerns | High |
| Patel 2016      | Low           | Low | Low | Low | Low              | Low  |
| Pisani 2015     | Low           | Low | Low | Low | Low              | Low  |
| Liu 2020 (2)    | Low           | Low | Low | Low | Low              | Low  |
| Yang 2015       | Some concerns | Low | Low | Low | Some<br>concerns | High |

# Supplementary Table E3: GRADE Summary of Findings Table

Question: Helmet NIV compared to oronasal NIV for respiratory failure

| Certainty assessment               |                       |                      |                      |              |                             |                      | № of patients  |                | Effect                    |                                                      | Certainty        | Importance |
|------------------------------------|-----------------------|----------------------|----------------------|--------------|-----------------------------|----------------------|----------------|----------------|---------------------------|------------------------------------------------------|------------------|------------|
| № of studies                       | Study design          | Risk of bias         | Inconsistency        | Indirectness | Imprecision                 | Other considerations | Helmet NIV     | oronasal NIV   | Relative (95% CI)         | Absolute (95% CI)                                    |                  |            |
| Mortality (RCT)                    |                       |                      |                      |              |                             |                      |                |                |                           |                                                      |                  |            |
| 5                                  | randomised trials     | not serious          | not serious          | not serious  | very serious <sup>a</sup>   | none                 | 16/131 (12.2%) | 26/125 (20.8%) | RR 0.56<br>(0.33 to 0.95) | 92 fewer per 1,000<br>(from 139 fewer to 10 fewer)   | ⊕⊕○○<br>LOW      | CRITICAL   |
| Intubation (RCT)                   |                       |                      |                      |              |                             |                      |                |                |                           |                                                      |                  |            |
| 9                                  | randomised trials     | serious <sup>b</sup> | not serious          | not serious  | serious <sup>a</sup>        | none                 | 20/220 (9.1%)  | 55/217 (25.3%) | RR 0.35<br>(0.22 to 0.56) | 165 fewer per 1,000<br>(from 198 fewer to 112 fewer) | ⊕⊕○○<br>LOW      | CRITICAL   |
| ICU LOS (RCT)                      |                       |                      |                      |              |                             |                      |                |                |                           |                                                      |                  |            |
| 6                                  | randomised trials     | serious <sup>b</sup> | serious <sup>c</sup> | not serious  | serious <sup>a</sup>        | none                 | 153            | 147            | -                         | MD 0.29 lower<br>(2.31 lower to 1.74 higher)         | ⊕○○○<br>VERY LOW | IMPORTANT  |
| Duration of NIV (RCT)              |                       |                      |                      |              |                             |                      |                |                |                           |                                                      |                  |            |
| 4                                  | randomised trials     | serious <sup>b</sup> | not serious          | not serious  | serious <sup>a</sup>        | none                 | 94             | 93             | -                         | MD 0.02 lower<br>(0.15 lower to 0.11 higher)         | ⊕⊕○○<br>LOW      | IMPORTANT  |
| Pressure sores (RCT)               |                       |                      |                      |              |                             |                      |                |                |                           |                                                      |                  |            |
| 5                                  | randomised trials     | serious <sup>b</sup> | not serious          | not serious  | very serious <sup>a,d</sup> | none                 | 8/121 (6.6%)   | 19/117 (16.2%) | RR 0.50<br>(0.19 to 1.37) | 81 fewer per 1,000<br>(from 132 fewer to 60 more)    | ⊕○○○<br>VERY LOW | IMPORTANT  |
| Intubation (observational studies) |                       |                      |                      |              |                             |                      |                |                |                           |                                                      |                  |            |
| 5                                  | observational studies | not serious          | not serious          | not serious  | serious <sup>a</sup>        | none                 | 30/127 (23.6%) | 63/160 (39.4%) | RR 0.65<br>(0.44 to 0.95) | 138 fewer per 1,000<br>(from 221 fewer to 20 fewer)  | ⊕○○○<br>VERY LOW | CRITICAL   |
| Mortality (observational studies)  |                       |                      |                      |              |                             |                      |                |                |                           |                                                      |                  |            |
| 5                                  | observational studies | not serious          | not serious          | not serious  | serious <sup>a</sup>        | none                 | 27/127 (21.3%) | 55/160 (34.4%) | RR 0.59<br>(0.40 to 0.88) | 141 fewer per 1,000<br>(from 206 fewer to 41 fewer)  | ⊕○○○<br>VERY LOW | CRITICAL   |

| Certainty assessment |              |              |               |              |             |                      | № of patients |              | Effect            |                   | Certainty | Importance |
|----------------------|--------------|--------------|---------------|--------------|-------------|----------------------|---------------|--------------|-------------------|-------------------|-----------|------------|
| № of studies         | Study design | Risk of bias | Inconsistency | Indirectness | Imprecision | Other considerations | Helmet NIV    | oronasal NIV | Relative (95% CI) | Absolute (95% CI) |           |            |

ICU LOS (observational studies)

|   |                       |             |             |             |                             |      |     |     |   |                                              |                                                                                              |           |
|---|-----------------------|-------------|-------------|-------------|-----------------------------|------|-----|-----|---|----------------------------------------------|----------------------------------------------------------------------------------------------|-----------|
| 4 | observational studies | not serious | not serious | not serious | very serious <sup>a,d</sup> | none | 110 | 143 | - | MD 1.15 lower<br>(3.93 lower to 1.63 higher) |  VERY LOW | IMPORTANT |
|---|-----------------------|-------------|-------------|-------------|-----------------------------|------|-----|-----|---|----------------------------------------------|----------------------------------------------------------------------------------------------|-----------|

Duration of NIV (Observational studies)

|   |                       |             |             |             |                      |      |     |     |   |                                                |                                                                                              |           |
|---|-----------------------|-------------|-------------|-------------|----------------------|------|-----|-----|---|------------------------------------------------|----------------------------------------------------------------------------------------------|-----------|
| 5 | observational studies | not serious | not serious | not serious | serious <sup>a</sup> | none | 127 | 160 | - | MD 0.22 higher<br>(0.12 higher to 0.32 higher) |  VERY LOW | IMPORTANT |
|---|-----------------------|-------------|-------------|-------------|----------------------|------|-----|-----|---|------------------------------------------------|----------------------------------------------------------------------------------------------|-----------|

CI: Confidence interval; RR: Risk ratio; MD: Mean difference

Explanations

- a. very low event numbers which are far below optimal information size
- b. high proportion of the included studies have high ROB
- c. High I squared with variable effects across studies
- d. wide confidence intervals that don't exclude serious benefit or harm

Question: Helmet NIV compared to HFNC for respiratory failure

| Certainty assessment |              |              |               |              |             |                      | № of patients |      | Effect            |                   | Certainty | Importance |
|----------------------|--------------|--------------|---------------|--------------|-------------|----------------------|---------------|------|-------------------|-------------------|-----------|------------|
| № of studies         | Study design | Risk of bias | Inconsistency | Indirectness | Imprecision | Other considerations | Helmet NIV    | HFNC | Relative (95% CI) | Absolute (95% CI) |           |            |

Mortality (RCTs)

|   |                   |                      |             |             |                             |      |                |                |                           |                                                  |                                                                                                |          |
|---|-------------------|----------------------|-------------|-------------|-----------------------------|------|----------------|----------------|---------------------------|--------------------------------------------------|------------------------------------------------------------------------------------------------|----------|
| 2 | randomised trials | serious <sup>a</sup> | not serious | not serious | very serious <sup>b,c</sup> | none | 17/148 (11.5%) | 24/149 (16.1%) | RR 0.72<br>(0.40 to 1.28) | 45 fewer per 1,000<br>(from 97 fewer to 45 more) |  VERY LOW | CRITICAL |
|---|-------------------|----------------------|-------------|-------------|-----------------------------|------|----------------|----------------|---------------------------|--------------------------------------------------|------------------------------------------------------------------------------------------------|----------|

Intubation (RCTs)

|   |                   |                      |             |             |                      |      |                |                |                           |                                                      |                                                                                           |          |
|---|-------------------|----------------------|-------------|-------------|----------------------|------|----------------|----------------|---------------------------|------------------------------------------------------|-------------------------------------------------------------------------------------------|----------|
| 2 | randomised trials | serious <sup>a</sup> | not serious | not serious | serious <sup>c</sup> | none | 23/148 (15.5%) | 39/149 (26.2%) | RR 0.59<br>(0.39 to 0.91) | 107 fewer per 1,000<br>(from 160 fewer to 24 fewer6) |  LOW | CRITICAL |
|---|-------------------|----------------------|-------------|-------------|----------------------|------|----------------|----------------|---------------------------|------------------------------------------------------|-------------------------------------------------------------------------------------------|----------|

Mortality (Observational studies)

|   |                       |             |             |             |                        |      |              |               |                           |                                                    |                                                                                                |          |
|---|-----------------------|-------------|-------------|-------------|------------------------|------|--------------|---------------|---------------------------|----------------------------------------------------|------------------------------------------------------------------------------------------------|----------|
| 2 | observational studies | not serious | not serious | not serious | serious <sup>b,c</sup> | none | 4/27 (14.8%) | 10/52 (19.2%) | RR 0.77<br>(0.16 to 3.75) | 44 fewer per 1,000<br>(from 162 fewer to 529 more) |  VERY LOW | CRITICAL |
|---|-----------------------|-------------|-------------|-------------|------------------------|------|--------------|---------------|---------------------------|----------------------------------------------------|------------------------------------------------------------------------------------------------|----------|

| Certainty assessment |              |              |               |              |             |                      | № of patients |      | Effect            |                   | Certainty | Importance |
|----------------------|--------------|--------------|---------------|--------------|-------------|----------------------|---------------|------|-------------------|-------------------|-----------|------------|
| № of studies         | Study design | Risk of bias | Inconsistency | Indirectness | Imprecision | Other considerations | Helmet NIV    | HFNC | Relative (95% CI) | Absolute (95% CI) |           |            |

Intubation (Observational studies)

|   |                       |             |             |             |                      |      |              |               |                           |                                                     |                                                                                                 |          |
|---|-----------------------|-------------|-------------|-------------|----------------------|------|--------------|---------------|---------------------------|-----------------------------------------------------|-------------------------------------------------------------------------------------------------|----------|
| 3 | observational studies | not serious | not serious | not serious | serious <sup>b</sup> | none | 9/42 (21.4%) | 27/67 (40.3%) | RR 0.69<br>(0.27 to 1.73) | 125 fewer per 1,000<br>(from 294 fewer to 294 more) | <br>VERY LOW | CRITICAL |
|---|-----------------------|-------------|-------------|-------------|----------------------|------|--------------|---------------|---------------------------|-----------------------------------------------------|-------------------------------------------------------------------------------------------------|----------|

CI: Confidence interval; RR: Risk ratio

Explanations

- a. One out of two included studies have high ROB
- b. wide confidence intervals that do not exclude serious benefit or harm
- c. very low event numbers which are far below optimal information size as only two small studies are included.

**Supplementary Table E4: Characteristics of Included Cohort and Case Series Studies**

| Author           | Year | Country      | Type of Helmet | Settings Used for Helmet                                                                                                                                                                                                                                                                                                                                                                                                                                                                                                    | Comparator             | Settings Used for Comparator                                                                       | Total (n) | Select Inclusion Criteria                                                                                                                                  | Outcomes                                                                                          |
|------------------|------|--------------|----------------|-----------------------------------------------------------------------------------------------------------------------------------------------------------------------------------------------------------------------------------------------------------------------------------------------------------------------------------------------------------------------------------------------------------------------------------------------------------------------------------------------------------------------------|------------------------|----------------------------------------------------------------------------------------------------|-----------|------------------------------------------------------------------------------------------------------------------------------------------------------------|---------------------------------------------------------------------------------------------------|
| Alharthy et al.  | 2020 | Saudi Arabia | H-CPAP         | CPAP at high flow rates to prevent rebreathing (median flow rate 45 L/min) with a median fraction of inspired oxygen of 40%.                                                                                                                                                                                                                                                                                                                                                                                                | High Flow Nasal Canula | Adjusted at a median flow rate of 60 L/min and median fraction of inspired oxygen of 40%.          | 30        | Adult patients with confirmed COVID-19 requiring higher support than standard oxygen                                                                       | Intubation Rate                                                                                   |
| Antonelli et al. | 2002 | Italy        | H-NIV (CaStar) | Once the helmet was positioned, pressure support was increased in increments of 2–3 cm H <sub>2</sub> O to obtain the patient comfort, a respiratory rate lower than 25 breaths/min, and the disappearance of accessory muscle activity (as evaluated by palpating the sternocleidomastoid muscle). PEEP was increased in increments of 2–3 cm H <sub>2</sub> O up to 10–12 cm H <sub>2</sub> O to assure a peripheral oxygen saturation of at least 92% with the lowest FIO <sub>2</sub> possible.                         | Facemask NIV           | Not Described                                                                                      | 99        | Non-COPD patients with acute respiratory failure as defined by study protocol                                                                              | Intubation Rate, Mortality, ICU Length of Stay, Duration of Mechanical Ventilation, Complications |
| Antonelli et al. | 2004 | Italy        | H-NIV (CaStar) | After the mask was secured, the initial level of 10 cmH <sub>2</sub> O pressure support was gradually increased in increments of 2–3 cmH <sub>2</sub> O to obtain a respiratory rate of less than 25 breaths/min, disappearance of accessory muscle activity (evaluated by palpating the sternocleidomastoid muscle), 12 and patient comfort. PEEP was set at 5–7 cmH <sub>2</sub> O to counterbalance the intrinsic PEEP level.                                                                                            | Facemask NIV           | Not Described                                                                                      | 66        | Patients with acute decompensation of COPD eligible for treatment with NPPV admitted to ICU                                                                | Intubation Rate, Mortality, ICU Length of Stay, Duration of Mechanical Ventilation, Complications |
| Conti et al.     | 2007 | Italy        | H-NIV (CaStar) | Started with 10 cm H <sub>2</sub> O of pressure support, with progressive stepwise increase of 2–3 cm H <sub>2</sub> O, according to patient comfort, to obtain a respiratory rate 25 breaths/min and the disappearance of accessory muscle activity or paradoxical abdominal motion. Positive end-expiratory pressure (PEEP) was increased in steps of 2–3 cm H <sub>2</sub> O, up to a maximum of 12 cm H <sub>2</sub> O, to maintain the arterial oxygen saturation over 90% with the lowest possible FIO <sub>2</sub> . | Facemask NIV           | Not Described                                                                                      | 50        | Patients who developed post operative acute respiratory failure after abdominal surgery admitted to the ICU                                                | Intubation Rate, Mortality, ICU Length of Stay, Duration of Mechanical Ventilation, Complications |
| Gaulton et al.   | 2020 | USA          | H-CPAP SeaLong | CPAP between 5 - 10 cm H <sub>2</sub> O and FiO <sub>2</sub> titrated to keep >92%.                                                                                                                                                                                                                                                                                                                                                                                                                                         | High Flow Nasal Canula | HFNC was adjusted at a median flow rate of 60 L/min and median fraction of inspired oxygen of 40%. | 59        | Patients with body mass index greater than or equal to 25 kg/m <sup>2</sup> and were candidates for non-invasive respiratory support as per study protocol | Intubation Rate, Mortality                                                                        |
| Giovini et al.   | 2019 | Italy        | H-CPAP         | Not Described                                                                                                                                                                                                                                                                                                                                                                                                                                                                                                               | High Flow Nasal Canula | Not Described                                                                                      | 20        | Patients with moderate ARDS as defined by Berlin criteria                                                                                                  | Intubation Rate, Mortality                                                                        |



|                 |      |       |                 |                                                                                                                                                                                                                                                                                                                                                                                                                                                                                                                       |               |                                               |    |                                                                                                                                                |                                                                                                   |
|-----------------|------|-------|-----------------|-----------------------------------------------------------------------------------------------------------------------------------------------------------------------------------------------------------------------------------------------------------------------------------------------------------------------------------------------------------------------------------------------------------------------------------------------------------------------------------------------------------------------|---------------|-----------------------------------------------|----|------------------------------------------------------------------------------------------------------------------------------------------------|---------------------------------------------------------------------------------------------------|
| Principi et al. | 2004 | Italy | H-CPAP (CaStar) | High-flow CPAP (Vital Signs, Brighton, UK) was set at 8 cmH <sub>2</sub> O with FIO <sub>2</sub> 0.6 controlled by means of an oximeter (Miniox II Oxygen Monitor, Catalyst Research Owings Mills, Md., USA).                                                                                                                                                                                                                                                                                                         | Facemask CPAP | Facemask CPAP (same settings as helmet group) | 34 | Patients presenting with dyspnea, tachypnea, use of accessory muscles, and paradoxical abdominal motion, with infiltrates on chest radiography | intubation Rate, Mortality, Duration of Mechanical Ventilation, Complications                     |
| Rocco et al.    | 2004 | Italy | H-NIV (CaStar)  | The ventilator was set with pressure support of 10 cm H <sub>2</sub> O, and the level of pressure support was progressively increased in increments of 2 to 3 cm H <sub>2</sub> O to obtain patient comfort, an RR 25 breaths/min, and the disappearance of accessory muscle activity. Positive end-expiratory pressure (PEEP) was increased by 2 to 3 cm H <sub>2</sub> O, up to a maximum level of 12 cm H <sub>2</sub> O to maintain the arterial oxygen saturation 90% with the lowest Fio <sub>2</sub> possible. | Facemask NIV  | Facemask NIV (same settings as helmet group)  | 38 | Immunocompromised patients with hypoxemic acute respiratory failure and pulmonary infiltrates admitted to ICU                                  | Intubation Rate, Mortality, ICU Length of Stay, Duration of Mechanical Ventilation, Complications |

## Non-Invasive Ventilation (NIV) Helmet – SR – Literature Search

### Research Question(s)

1. In all patients with acute respiratory failure, does the use of helmet NIV reduce mortality, intubation rate and days of MV compared to oro-nasal NIV and high flow nasal cannula (HFNC).  
Patient – All adult patients acute with respiratory failure of any type or etiology  
Intervention – NIV delivered by helmet interface  
Control – Oro-nasal NIV or high flow nasal cannula  
Outcome – mortality, intubation, invasive mechanical ventilator free days, duration of mechanical ventilation, duration of NIV, ICU length of stay, hospital length of stay, patient comfort and adverse events  
-for mortality, we will capture closest to 30 days or if not available, hospital mortality  
-for intubation, we will capture any need for intubation during index hospitalization

### Seed Articles:

- Ferreyro BL, et al. Association of noninvasive oxygenation strategies with all-cause mortality in adults with acute hypoxemic respiratory failure: a systematic review and meta-analysis. JAMA. 2020 Jul 7;324(1):57-67. <https://pubmed.ncbi.nlm.nih.gov/32496521/>
- Patel BK, et al. Effect of noninvasive ventilation delivered by helmet vs face mask on the rate of endotracheal intubation in patients with acute respiratory distress syndrome: a randomized clinical trial. JAMA. 2016;315(22):2435-2441. <https://pubmed.ncbi.nlm.nih.gov/27179847/>

**Search by:** Kaitryn Campbell ([kcampbel@stjosham.on.ca](mailto:kcampbel@stjosham.on.ca))

**Requestor:** Dipayan Chaudhuri ([dipayan.chaudhuri@medportal.ca](mailto:dipayan.chaudhuri@medportal.ca))

**Date(s):** 2020 Oct 23

**Limits:** NOT case reports; Human NOT Animal

**Databases:** Ovid Medline [ppez] & Embase [oomezd]; Web of Science; The Cochrane Library; International HTA database (<https://database.inahta.org/>); EBSCO CINAHL Complete; LILACS; WHO COVID-19 Global literature on coronavirus disease (<https://search.bvsalud.org/global-literature-on-novel-coronavirus-2019-ncov/>)

**Filters:** None

**Output:** RIS (931 results total after duplicates removed)

### Concept #1: Noninvasive Ventilation, etc.

Noninvasive Ventilation/

Oxygen Inhalation Therapy/ use ppez

Oxygen Therapy/ use oomezd

((non-invasive\* OR noninvasive\*) ADJ3 (oxygen\* OR O2 OR ventilat\*)).tw,kf,kw.

Respiratory Insufficiency/ use ppez

Respiratory Distress Syndrome, Adult/ use ppez

Respiratory Failure/ use oomezd

Acute Respiratory Failure/ use oomezd

Adult Respiratory Distress Syndrome/ use oomezd

((lung? OR respiratory OR respiration OR pulmonary OR ventilator?) ADJ2 (depress\* OR insufficien\* OR fail\* OR deficien\* OR disturb\* OR dysfunction\* OR compromis\*)).tw,kf,kw.

((acute OR adult\*) ADJ respiratory distress) OR ARDS OR ARDSS).tw,kf,kw.

Continuous Positive Airway Pressure/ use ppez

Positive End Expiratory Pressure/ use oomezd

(continuous positive airway pressure OR CPAP OR nCPAP OR CPPB OR CPPV OR continuous positive pressure ventilation OR CPPV OR airway pressure release ventilation OR APRV OR ((bi-level OR bilevel) ADJ2 positive airway pressure) OR (hyperbaric ADJ (respiration OR ventilation)) OR

(positive pressure ADJ (breathing OR respiration OR ventilation)) OR positive endexpiratory pressure breathing OR PEEP).tw,kf,kw.

å

## Concept #2: Helmet

Head Protective Devices/ use ppez

exp Helmet/ use oomezd

helmet\*.tw,kf,kw.

exp animals/

exp animal experimentation/ OR exp animal experiment/

exp models animal/

nonhuman/

exp vertebrate/ OR exp vertebrates/

or/

exp humans/

exp human experimentation/ OR exp human experiment/

or/

25 not 28

(Case Reports.pt. OR \*Case Report/) NOT (case series.ti. AND (Case Reports.pt. OR \*Case Report/))

## Ovid

Database(s): **Embase** 1974 to 2020 October 22, OVID Medline Epub Ahead of Print, In-Process & Other Non-Indexed Citations, Ovid MEDLINE(R) Daily and Ovid MEDLINE(R) 1946 to Present

Search Strategy:

| #  | Searches                                                                                                                                                                                                                                                                                                                                                                                                                | Results  |
|----|-------------------------------------------------------------------------------------------------------------------------------------------------------------------------------------------------------------------------------------------------------------------------------------------------------------------------------------------------------------------------------------------------------------------------|----------|
| 1  | Noninvasive Ventilation/                                                                                                                                                                                                                                                                                                                                                                                                | 12868    |
| 2  | Oxygen Inhalation Therapy/ use ppez                                                                                                                                                                                                                                                                                                                                                                                     | 14575    |
| 3  | Oxygen Therapy/ use oomezd                                                                                                                                                                                                                                                                                                                                                                                              | 30522    |
| 4  | ((non-invasive* or noninvasive*) adj3 (oxygen* or O2 or ventilat*)).tw,kf,kw.                                                                                                                                                                                                                                                                                                                                           | 25627    |
| 5  | Respiratory Insufficiency/ use ppez                                                                                                                                                                                                                                                                                                                                                                                     | 32369    |
| 6  | Respiratory Distress Syndrome, Adult/ use ppez                                                                                                                                                                                                                                                                                                                                                                          | 19909    |
| 7  | Respiratory Failure/ use oomezd                                                                                                                                                                                                                                                                                                                                                                                         | 68775    |
| 8  | Acute Respiratory Failure/ use oomezd                                                                                                                                                                                                                                                                                                                                                                                   | 12805    |
| 9  | Adult Respiratory Distress Syndrome/ use oomezd                                                                                                                                                                                                                                                                                                                                                                         | 39543    |
| 10 | ((lung? or respiratory or respiration or pulmonary or ventilator?) adj2 (depress* or insufficien* or fail* or deficien* or disturb* or dysfunction* or compromis*)).tw,kf,kw.                                                                                                                                                                                                                                           | 180943   |
| 11 | ((acute or adult*) adj respiratory distress) or ARDS or ARDSS).tw,kf,kw.                                                                                                                                                                                                                                                                                                                                                | 61262    |
| 12 | Continuous Positive Airway Pressure/ use ppez                                                                                                                                                                                                                                                                                                                                                                           | 7288     |
| 13 | Positive End Expiratory Pressure/ use oomezd                                                                                                                                                                                                                                                                                                                                                                            | 55218    |
| 14 | (continuous positive airway pressure or CPAP or nCPAP or CPPB or CPPV or continuous positive pressure ventilation or CPPV or airway pressure release ventilation or APRV or ((bi-level or bilevel) adj2 positive airway pressure) or (hyperbaric adj (respiration or ventilation)) or (positive pressure adj (breathing or respiration or ventilation)) or positive endexpiratory pressure breathing or PEEP).tw,kf,kw. | 64104    |
| 15 | or/1-14 [Noninvasive Ventilation, etc. Concept]                                                                                                                                                                                                                                                                                                                                                                         | 408808   |
| 16 | Head Protective Devices/ use ppez                                                                                                                                                                                                                                                                                                                                                                                       | 3598     |
| 17 | exp Helmet/ use oomezd                                                                                                                                                                                                                                                                                                                                                                                                  | 5703     |
| 18 | helmet*.tw,kf,kw.                                                                                                                                                                                                                                                                                                                                                                                                       | 12414    |
| 19 | or/16-18 [Helmet Concept]                                                                                                                                                                                                                                                                                                                                                                                               | 14658    |
| 20 | exp animals/                                                                                                                                                                                                                                                                                                                                                                                                            | 49787816 |
| 21 | exp animal experimentation/ or exp animal experiment/                                                                                                                                                                                                                                                                                                                                                                   | 2630293  |
| 22 | exp models animal/                                                                                                                                                                                                                                                                                                                                                                                                      | 2002835  |
| 23 | nonhuman/                                                                                                                                                                                                                                                                                                                                                                                                               | 6362133  |
| 24 | exp vertebrate/ or exp vertebrates/                                                                                                                                                                                                                                                                                                                                                                                     | 48451569 |

|    |                                                                                                          |          |
|----|----------------------------------------------------------------------------------------------------------|----------|
| 25 | or/20-24                                                                                                 | 51664560 |
| 26 | exp humans/                                                                                              | 40330743 |
| 27 | exp human experimentation/ or exp human experiment/                                                      | 534778   |
| 28 | or/26-27                                                                                                 | 40333169 |
| 29 | 25 not 28                                                                                                | 11333047 |
| 30 | 15 and 19 [Noninvasive Ventilation, etc.+ Helmet]                                                        | 670      |
| 31 | 30 not 29 [Noninvasive Ventilation, etc.+ Helmet, Human NOT Animal Filter applied]                       | 652      |
| 32 | (Case Reports.pt. or *Case Report/) not (case series.ti. and (Case Reports.pt. or *Case Report/))        | 2144091  |
| 33 | 31 not 32 [Noninvasive Ventilation, etc.+ Helmet, Human NOT Animal Filter applied, Case Reports removed] | 622      |
| 34 | remove duplicates from 33 [Final results, Human NOT Animal, Case Reports & duplicates removed]           | 426      |

| Set  | Results | Search Terms                                                                                                                                                                                                                                                                                                                                                                                                                |
|------|---------|-----------------------------------------------------------------------------------------------------------------------------------------------------------------------------------------------------------------------------------------------------------------------------------------------------------------------------------------------------------------------------------------------------------------------------|
| # 25 | 326     | #24 AND #18<br>Indexes=SCI-EXPANDED, CPCI-S, ESCI Timespan=All years                                                                                                                                                                                                                                                                                                                                                        |
| # 24 | 9,501   | #23 OR #22 OR #21 OR #20 OR #19                                                                                                                                                                                                                                                                                                                                                                                             |
| # 23 | 2,041   | AK=helmet*                                                                                                                                                                                                                                                                                                                                                                                                                  |
| # 22 | 6,684   | AB=helmet*                                                                                                                                                                                                                                                                                                                                                                                                                  |
| # 21 | 3,996   | TI=helmet*                                                                                                                                                                                                                                                                                                                                                                                                                  |
| # 20 | 9,296   | TS=helmet*                                                                                                                                                                                                                                                                                                                                                                                                                  |
| # 19 | 331     | TS=Head Protective Devices                                                                                                                                                                                                                                                                                                                                                                                                  |
| # 18 | 112,258 | #17 OR #16 OR #15 OR #14 OR #13 OR #12 OR #11 OR #10 OR #9 OR #8 OR #7 OR #6 OR #5 OR #4 OR #3 OR #2 OR #1                                                                                                                                                                                                                                                                                                                  |
| # 17 | 5,966   | AK=((continuous positive airway pressure OR CPAP OR nCPAP OR CPPB OR CPPV OR continuous positive pressure ventilation OR CPPV OR airway pressure release ventilation OR APRV OR ((bi-level OR bilevel) NEAR/2 positive airway pressure) OR (hyperbaric NEAR/1 (respiration OR ventilation) ) OR (positive pressure NEAR/1 (breathing OR respiration OR ventilation) ) OR positive endexpiratory pressure breathing OR PEEP) |
| # 16 | 17,782  | AB=((continuous positive airway pressure OR CPAP OR nCPAP OR CPPB OR CPPV OR continuous positive pressure ventilation OR CPPV OR airway pressure release ventilation OR APRV OR ((bi-level OR bilevel) NEAR/2 positive airway pressure) OR (hyperbaric NEAR/1 (respiration OR ventilation) ) OR (positive pressure NEAR/1 (breathing OR respiration OR ventilation) ) OR positive endexpiratory pressure breathing OR PEEP) |
| # 15 | 12,327  | TI=((continuous positive airway pressure OR CPAP OR nCPAP OR CPPB OR CPPV OR continuous positive pressure ventilation OR CPPV OR airway pressure release ventilation OR APRV OR ((bi-level OR bilevel) NEAR/2 positive airway pressure) OR (hyperbaric NEAR/1 (respiration OR ventilation) ) OR (positive pressure NEAR/1 (breathing OR respiration OR ventilation) ) OR positive endexpiratory pressure breathing OR PEEP) |
| # 14 | 10,459  | TS=Continuous Positive Airway Pressure                                                                                                                                                                                                                                                                                                                                                                                      |
| # 13 | 8,234   | AK=((((acute OR adult*) NEAR/1 respiratory distress) OR ARDS OR ARDSS)                                                                                                                                                                                                                                                                                                                                                      |
| # 12 | 16,163  | AB=((((acute OR adult*) NEAR/1 respiratory distress) OR ARDS OR ARDSS)                                                                                                                                                                                                                                                                                                                                                      |
| # 11 | 12,237  | TI=((((acute OR adult*) NEAR/1 respiratory distress) OR ARDS OR ARDSS)                                                                                                                                                                                                                                                                                                                                                      |
| # 10 | 7,119   | AK=((lung? OR respiratory OR respiration OR pulmonary OR ventilator?) NEAR/2 (depress* OR insufficien* OR fail* OR deficien* OR disturb* OR dysfunction* OR compromis*) )                                                                                                                                                                                                                                                   |
| # 9  | 44,619  | AB=((lung? OR respiratory OR respiration OR pulmonary OR ventilator?) NEAR/2 (depress* OR insufficien* OR fail* OR deficien* OR disturb* OR dysfunction* OR compromis*) )                                                                                                                                                                                                                                                   |
| # 8  | 15,389  | TI=((lung? OR respiratory OR respiration OR pulmonary OR ventilator?) NEAR/2 (depress* OR insufficien* OR fail* OR deficien* OR disturb* OR dysfunction* OR compromis*) )                                                                                                                                                                                                                                                   |
| # 7  | 7,886   | TS=Respiratory Distress Syndrome, Adult                                                                                                                                                                                                                                                                                                                                                                                     |
| # 6  | 6,679   | TS=Respiratory Insufficiency                                                                                                                                                                                                                                                                                                                                                                                                |
| # 5  | 3,255   | AK=((non-invasive* OR noninvasive*) NEAR/3 (oxygen* OR O2 OR ventilat*) )                                                                                                                                                                                                                                                                                                                                                   |
| # 4  | 6,556   | AB=((non-invasive* OR noninvasive*) NEAR/3 (oxygen* OR O2 OR ventilat*) )                                                                                                                                                                                                                                                                                                                                                   |
| # 3  | 5,713   | TI=((non-invasive* OR noninvasive*) NEAR/3 (oxygen* OR O2 OR ventilat*) )                                                                                                                                                                                                                                                                                                                                                   |
| # 2  | 1,211   | TS=Oxygen Inhalation Therapy                                                                                                                                                                                                                                                                                                                                                                                                |
| # 1  | 8,419   | TS=Noninvasive Ventilation                                                                                                                                                                                                                                                                                                                                                                                                  |

## The Cochrane Library

| ID  | Search                                                                                                                                                                                                                                                                                                                                                                                                                    | Hits    |
|-----|---------------------------------------------------------------------------------------------------------------------------------------------------------------------------------------------------------------------------------------------------------------------------------------------------------------------------------------------------------------------------------------------------------------------------|---------|
| #1  | MeSH descriptor: [Noninvasive Ventilation] this term only                                                                                                                                                                                                                                                                                                                                                                 | 241     |
| #2  | MeSH descriptor: [Oxygen Inhalation Therapy] this term only                                                                                                                                                                                                                                                                                                                                                               | 1157    |
| #3  | ((non-invasive* OR noninvasive*) NEAR3 (oxygen* OR O2 OR ventilat*)):ti,ab,kw                                                                                                                                                                                                                                                                                                                                             | 0       |
| #4  | MeSH descriptor: [Respiratory Insufficiency] this term only                                                                                                                                                                                                                                                                                                                                                               | 1577    |
| #5  | ((lung? OR respiratory OR respiration OR pulmonary OR ventilator?) NEAR2 (depress* OR insufficien* OR fail* OR deficien* OR disturb* OR dysfunction* OR compromis*)):ti,ab,kw OR (((acute OR adult*) NEXT respiratory distress) OR ARDS OR ARDSS):ti,ab,kw                                                                                                                                                                | 2826    |
| #6  | MeSH descriptor: [Continuous Positive Airway Pressure] this term only                                                                                                                                                                                                                                                                                                                                                     | 1074    |
| #7  | (continuous positive airway pressure OR CPAP OR nCPAP OR CPPB OR CPPV OR continuous positive pressure ventilation OR CPPV OR airway pressure release ventilation OR APRV OR ((bi-level OR bilevel) NEAR2 positive airway pressure) OR (hyperbaric NEXT (respiration OR ventilation)) OR (positive pressure NEXT (breathing OR respiration OR ventilation)) OR positive endexpiratory pressure breathing OR PEEP):ti,ab,kw | 9922    |
| #8  | #1 OR #2 OR #3 OR #4 OR #5 OR #6 OR #7                                                                                                                                                                                                                                                                                                                                                                                    | 1694300 |
| #9  | MeSH descriptor: [Head Protective Devices] explode all trees                                                                                                                                                                                                                                                                                                                                                              | 97      |
| #10 | (helmet*):ti,ab,kw                                                                                                                                                                                                                                                                                                                                                                                                        | 459     |
| #11 | #9 OR #10                                                                                                                                                                                                                                                                                                                                                                                                                 | 476     |
| #12 | #8 AND #11 in Trials                                                                                                                                                                                                                                                                                                                                                                                                      | 468     |

## EBSCO CINAHL Complete

| #   | Query                                                                                                                                                                                                                                                                                                                                                                                                                                                                                                                                                                                                                                                                                                                                                                                                                            | Results |
|-----|----------------------------------------------------------------------------------------------------------------------------------------------------------------------------------------------------------------------------------------------------------------------------------------------------------------------------------------------------------------------------------------------------------------------------------------------------------------------------------------------------------------------------------------------------------------------------------------------------------------------------------------------------------------------------------------------------------------------------------------------------------------------------------------------------------------------------------|---------|
| S11 | S7 AND S10                                                                                                                                                                                                                                                                                                                                                                                                                                                                                                                                                                                                                                                                                                                                                                                                                       | 26      |
| S10 | S8 OR S9                                                                                                                                                                                                                                                                                                                                                                                                                                                                                                                                                                                                                                                                                                                                                                                                                         | 2,980   |
| S9  | TI helmet* OR AB helmet*                                                                                                                                                                                                                                                                                                                                                                                                                                                                                                                                                                                                                                                                                                                                                                                                         | 2,157   |
| S8  | (MH "Head Protective Devices")                                                                                                                                                                                                                                                                                                                                                                                                                                                                                                                                                                                                                                                                                                                                                                                                   | 2,098   |
| S7  | S1 OR S2 OR S3 OR S4 OR S5 OR S6                                                                                                                                                                                                                                                                                                                                                                                                                                                                                                                                                                                                                                                                                                                                                                                                 | 41,268  |
|     | TI ( continuous positive airway pressure OR CPAP OR nCPAP OR CPPB OR CPPV OR continuous positive pressure ventilation OR CPPV OR airway pressure release ventilation OR APRV OR ((bi-level OR bilevel) N2 positive airway pressure) OR (hyperbaric N1 (respiration OR ventilation)) OR (positive pressure N1 (breathing OR respiration OR ventilation)) OR positive endexpiratory pressure breathing OR PEEP ) OR AB ( continuous positive airway pressure OR CPAP OR nCPAP OR CPPB OR CPPV OR continuous positive pressure ventilation OR CPPV OR airway pressure release ventilation OR APRV OR ((bi-level OR bilevel) N2 positive airway pressure) OR (hyperbaric N1 (respiration OR ventilation)) OR (positive pressure N1 (breathing OR respiration OR ventilation)) OR positive endexpiratory pressure breathing OR PEEP ) | 8,111   |
| S5  | (MH "Continuous Positive Airway Pressure")                                                                                                                                                                                                                                                                                                                                                                                                                                                                                                                                                                                                                                                                                                                                                                                       | 5,335   |
|     | TI ( (lung? OR respiratory OR respiration OR pulmonary OR ventilator?) N2 (depress* OR insufficien* OR fail* OR deficien* OR disturb* OR dysfunction* OR compromis* ) OR AB ( (lung? OR respiratory OR respiration OR pulmonary OR ventilator?) N2 (depress* OR insufficien* OR fail* OR deficien* OR disturb* OR dysfunction* OR compromis* ) OR TI ( ((acute OR adult*) N1 respiratory distress) OR ARDS OR ARDSS ) OR AB ( ((acute OR adult*) N1 respiratory distress) OR ARDS OR ARDSS )                                                                                                                                                                                                                                                                                                                                     | 22,824  |
| S3  | (MH "Respiratory Failure") OR (MH "Respiratory Distress Syndrome+")                                                                                                                                                                                                                                                                                                                                                                                                                                                                                                                                                                                                                                                                                                                                                              | 10,890  |
| S2  | TX (non-invasive* OR noninvasive*) N3 (oxygen* OR O2 OR ventilat*)                                                                                                                                                                                                                                                                                                                                                                                                                                                                                                                                                                                                                                                                                                                                                               | 3,999   |
| S1  | (MH "Pressure Support Ventilation") OR (MH "Positive Pressure Ventilation+")                                                                                                                                                                                                                                                                                                                                                                                                                                                                                                                                                                                                                                                                                                                                                     | 11,309  |

International HTA database (<https://database.inahta.org/>)

=0 relevant results

"Head Protective Devices"[mhe] OR (helmet\*)

LILACS (<http://bases.bireme.br/cgi-bin/wxislind.exe/iah/online/?IisScript=iah/iah.xis&base=LILACS&lang=i&form=F>)

=0 relevant results

helmet\* [all]

WHO COVID-19 Global literature on coronavirus disease (<https://search.bvsalud.org/global-literature-on-novel-coronavirus-2019-ncov/>)

=40 results

helmet\* [all]
