# Supplementary material
Source: HighWire-hosted journal article supplement (https://erj.ersjournals.com/content/59/3/2101269)
Supplement: inline-supplementary-material-3 [file inline-supplementary-material-3.pdf]

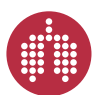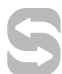

SHAREABLE PDF

# Helmet noninvasive ventilation compared to facemask noninvasive ventilation and high-flow nasal cannula in acute respiratory failure: a systematic review and meta-analysis

Dipayan Chaudhuri<sup>1,2,13</sup>, Rehman Jinah<sup>1,13</sup>, Karen E.A. Burns<sup>2,3,4</sup>, Federico Angriman<sup>3,5,6</sup>, Bruno L. Ferreyro<sup>3,6,7</sup>, Laveena Munshi<sup>3,7</sup>, Ewan Goligher<sup>3,8,9</sup>, Damon Scales<sup>3,5,6</sup>, Deborah J. Cook<sup>1,2,10</sup>, Tommaso Mauri<sup>11,12</sup> and Bram Rochweg<sup>1,2</sup>

<sup>1</sup>Dept of Medicine, Division of Critical Care, McMaster University, Hamilton, ON, Canada. <sup>2</sup>Dept of Health Research Methods, Evidence, and Impact, McMaster University, Hamilton, ON, Canada. <sup>3</sup>Interdepartmental Division of Critical Care Medicine, University of Toronto, Toronto, ON, Canada. <sup>4</sup>Li Ka Shing Knowledge Institute, Unity Health Toronto – St Michael's Hospital, Toronto, ON, Canada. <sup>5</sup>Dept of Critical Care Medicine, Sunnybrook Health Sciences Centre, Toronto, ON, Canada. <sup>6</sup>Institute of Health Policy, Management and Evaluation, Dalla Lana School of Public Health, University of Toronto, Toronto, ON, Canada. <sup>7</sup>Dept of Medicine, Sinai Health System and University Health Network, Toronto, ON, Canada. <sup>8</sup>Dept of Medicine, Division of Respiriology, University Health Network, Toronto, ON, Canada. <sup>9</sup>Toronto General Hospital Research Institute, Toronto, ON, Canada. <sup>10</sup>Division of Critical Care Medicine, St Joseph's Hospital, Hamilton, ON, Canada. <sup>11</sup>Dept of Pathophysiology and Transplantation, University of Milan, Milan, Italy. <sup>12</sup>Dept of Anaesthesia, Critical Care and Emergency, Fondazione IRCCS Ca Granda Ospedale Maggiore Policlinico, Milan, Italy. <sup>13</sup>These authors share first authorship.

Corresponding author: Bram Rochweg ([rochweg@mcmaster.ca](mailto:rochweg@mcmaster.ca))

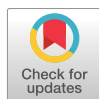

Shareable abstract (@ERSpublications)

**Helmet NIV may reduce mortality and intubation when compared to facemask NIV; however, large, well-designed RCTs are needed on this topic** <https://bit.ly/3i1rCnS>

**Cite this article as:** Chaudhuri D, Jinah R, Burns KEA, et al. Helmet noninvasive ventilation compared to facemask noninvasive ventilation and high-flow nasal cannula in acute respiratory failure: a systematic review and meta-analysis. *Eur Respir J* 2022; 59: 2101269 [DOI: 10.1183/13993003.01269-2021].

This single-page version can be shared freely online.

Copyright ©The authors 2022.  
For reproduction rights and  
permissions contact  
[permissions@ersnet.org](mailto:permissions@ersnet.org)

Received: 4 May 2021  
Accepted: 17 July 2021

## Abstract

**Background** Although small randomised controlled trials (RCTs) and observational studies have examined helmet noninvasive ventilation (NIV), uncertainty remains regarding its role. We conducted a systematic review and meta-analysis to examine the effect of helmet NIV compared to facemask NIV or high-flow nasal cannula (HFNC) in acute respiratory failure.

**Methods** We searched multiple databases to identify RCTs and observational studies reporting on at least one of mortality, intubation, intensive care unit (ICU) length of stay, NIV duration, complications or comfort with NIV therapy. We assessed study risk of bias using the Cochrane Risk of Bias 2 tool for RCTs and the Ottawa–Newcastle Scale for observational studies, and rated certainty of pooled evidence using the GRADE (Grading of Recommendations, Assessment, Development and Evaluation) framework.

**Results** We separately pooled data from 16 RCTs (n=949) and eight observational studies (n=396). Compared to facemask NIV, based on low certainty of evidence, helmet NIV may reduce mortality (relative risk 0.56, 95% CI 0.33–0.95) and intubation (relative risk 0.35, 95% CI 0.22–0.56) in both hypoxic and hypercapnic respiratory failure, but may have no effect on duration of NIV. There was an uncertain effect of helmet NIV on ICU length of stay and development of pressure sores. Data from observational studies were consistent with the foregoing findings but of lower certainty. Based on low and very low certainty data, helmet NIV may reduce intubation compared to HFNC, but its effect on mortality is uncertain.

**Conclusions** Compared to facemask NIV, helmet NIV may reduce mortality and intubation; however, the effect of helmet NIV compared to HFNC remains uncertain.
